# Supplementary material for: Leaf turgor loss point shapes local and regional distributions of evergreen but not deciduous tropical trees
Source: PubMed Central journal article supplement — New Phytol. 2021 Feb 10;230(2):485–96. doi: 10.1111/nph.17187 (PMC8048579; doi:10.1111/nph.17187), 2021-02-10
Supplement: NPH-230-485-s001.pdf [file NPH-230-485-s001.pdf]

1 New Phytologist Supporting Information

2

3 Article title: Leaf turgor loss point shapes local and regional distributions of evergreen but not deciduous  
4 tropical trees

5

6 Authors: Norbert Kunert, Joseph Zailaa, Valentine Herrmann, Helene C. Muller-Landau, S. Joseph Wright,  
7 Rolando Pérez, Sean M. McMahon, Richard C. Condit, Steven P. Hubbell, Lawren Sack, Stuart J. Davies and  
8 Kristina J. Anderson-Teixeira

9

10 Article acceptance date: 23 December 2020

11 Table S1. Summary of observed mean turgor loss point ( $\pi_{\text{tip}}$ ), leaf mass area (LMA), wood density (WD), and  
 12 leaf phenology. Standard deviation is given for all mean values.

| Species                                                               | Family           | $\pi_{\text{tip}}$ (MPa) |      | LMA (g m <sup>-2</sup> ) |      | WD (g cm <sup>-3</sup> ) |       | Leaf phenology |
|-----------------------------------------------------------------------|------------------|--------------------------|------|--------------------------|------|--------------------------|-------|----------------|
|                                                                       |                  | Mean                     | SD   | Mean                     | SD   | Mean                     | SD    |                |
| <i>Alseis blackiana</i> Hemsl.                                        | Rubiaceae        | -1.59                    | 0.03 | 31.7                     | 1.7  | 0.483                    | 0.020 | DF             |
| <i>Anacardium excelsum</i> (Bertero ex Kunth) Skeels                  | Anacardiaceae    | -1.68                    | 0.06 | 103.8                    | 20.5 | 0.350                    | 0.015 | DB             |
| <i>Annona spraguei</i> Saff.                                          | Annonaceae       | -2.12                    | 0.02 | 47.3                     | 9.6  | 0.391                    | 0.106 | DF             |
| <i>Apeiba membranacea</i> Spruce ex Benth.                            | Malvaceae        | -1.33                    | 0.02 | 60.1                     | 17.0 | 0.258                    | 0.004 | DF             |
| <i>Beilschmiedia pendula</i> (Sw.) Hemsl.                             | Lauraceae        | -1.41                    | 0.10 | 72.5                     | 10.3 | 0.466                    | 0.021 | E              |
| <i>Brosimum alicastrum</i> Sw.                                        | Moraceae         | -1.82                    | 0.11 | 52.6                     | 8.2  | 0.479                    | 0.012 | DB             |
| <i>Calophyllum longifolium</i> Willd.                                 | Clusiaceae       | -1.41                    | 0.03 | 153.4                    | 26.7 | 0.427                    | 0.021 | E              |
| <i>Cavanillesia platanifolia</i> (Humb. & Bonpl.) Kunth               | Bombacaceae      | -1.73                    | 0.05 | 73.6                     | 2.9  | 0.318                    | 0.064 | DO             |
| <i>Cecropia insignis</i> Liebm.                                       | Urticaceae       | -1.55                    | 0.02 | 71.2                     | 12.5 | 0.323                    | 0.050 | E              |
| <i>Cedrela odorata</i> L.                                             | Meliaceae        | -1.74                    | 0.04 | 39.6                     | 6.4  | 0.336                    | 0.074 | DB             |
| <i>Ceiba pentandra</i> (L.) Gaertn                                    | Malvaceae        | -1.73                    | 0.07 | 107.1                    | 40.0 | 0.387                    | 0.087 | DO             |
| <i>Cordia alliodora</i> (Ruiz & Pav.) Oken                            | Boraginaceae     | -1.40                    | 0.03 | 110.4                    | 19.1 | 0.516                    | 0.051 | DF             |
| <i>Dalbergia retusa</i> Hemsl.                                        | Leguminosae      | -1.25                    | 0.12 | 66.6                     | 6.1  | 0.507                    | 0.036 | D              |
| <i>Dendropanax arboreus</i> (L.) Decne. & Planch.                     | Araliaceae       | -1.57                    | 0.05 | 63.3                     | 5.3  | 0.410                    | 0.059 | E              |
| <i>Dipteryx oleifera</i> Benth.                                       | Leguminosae      | -1.91                    | 0.12 | 62.4                     | 10.8 | 0.631                    | 0.015 | DB             |
| <i>Faramea occidentalis</i> (L.) A.Rich                               | Rubiaceae        | -1.84                    | 0.09 | 63.9                     | 7.8  | 0.621                    | 0.030 | E              |
| <i>Ficus costaricana</i> (Liebm.) Miq.                                | Moraceae         | -1.52                    | 0.03 | 104.5                    | 35.1 | 0.335                    | 0.119 | E              |
| <i>Genipa americana</i> L.                                            | Rubiaceae        | -1.99                    | 0.06 | 79.4                     | 3.8  | 0.622                    | 0.035 | DF             |
| <i>Guapira standleyana</i> (Standl.) Little                           | Nyctaginaceae    | -1.57                    | 0.08 | 52.4                     | 5.6  | 0.439                    | 0.041 | E              |
| <i>Gustavia superba</i> (Kunth) O.Berg                                | Lecythidaceae    | -1.95                    | 0.08 | 76.6                     | 28.2 | 0.319                    | 0.073 | E              |
| <i>Hirtella triandra</i> Sw.                                          | Chrysobalanaceae | -1.59                    | 0.03 | 70.2                     | 9.8  | 0.548                    | 0.054 | E              |
| <i>Hura crepitans</i> L.                                              | Euphorbiaceae    | -2.28                    | 0.03 | 34.3                     | 4.7  | 0.347                    | 0.063 | DF             |
| <i>Hybanthus prunifolius</i> (Humb. & Bonpl. ex Schult.) Schulze-Menz | Violaceae        | -1.64                    | 0.16 | 39.0                     | 10.9 | 0.590                    | 0.037 | E              |
| <i>Inga peyzifera</i> Benth.                                          | Leguminosae      | -1.57                    | 0.02 | 39.6                     | 3.5  | 0.274                    | 0.042 | E              |
| <i>Jacaranda copaia</i> (Aubl.) D.Don                                 | Bignoniaceae     | -1.69                    | 0.23 | 48.4                     | 20.3 | 0.254                    | 0.017 | DB             |
| <i>Luehea seemannii</i> Triana & Planch                               | Malvaceae        | -2.05                    | 0.20 | 90.4                     | 12.2 | 0.408                    | 0.079 | DF             |
| <i>Miconia argentea</i> (Sw.) DC.                                     | Melastomataceae  | -1.82                    | 0.12 | 102.7                    | 6.4  | 0.894                    | 0.715 | E              |
| <i>Nectandra lineata</i> (Kunth) Rohwer                               | Lauraceae        | -1.90                    | 0.10 | 54.6                     | 4.4  | 0.456                    | 0.037 | E              |
| <i>Ochroma pyramidale</i> (Cav. ex Lam.) Urb.                         | Malvaceae        | -1.63                    | 0.09 | 79.2                     | 10.8 | 0.224                    | 0.012 | D              |
| <i>Ocotea whitei</i> Woodson                                          | Lauraceae        | -1.71                    | 0.10 | 74.9                     | 15.5 | 0.567                    | 0.105 | E              |
| <i>Oenocarpus mapora</i> H.Karst                                      | Arecaceae        | -1.82                    | 0.06 | 97.5                     | 7.3  | 0.228                    | 0.079 | E              |
| <i>Piper cordulatum</i> C. DC.                                        | Piperaceae       | -1.45                    | 0.03 | 55.5                     | 9.0  | 0.495                    | 0.057 | E              |
| <i>Piper reticulatum</i> L.                                           | Piperaceae       | -1.53                    | 0.04 | 57.5                     | 10.5 | 0.471                    | 0.092 | E              |
| <i>Poulsenia armata</i> (Miq.) Standl.                                | Moraceae         | -1.43                    | 0.05 | 66.9                     | 5.2  | 0.319                    | 0.009 | E              |
| <i>Protium tenuifolium</i> (Engl.) Engl.                              | Burseraceae      | -1.73                    | 0.18 | 84.1                     | 20.1 | 0.448                    | 0.039 | E              |
| <i>Pseudobombax septenatum</i> (Jacq.) Dugand                         | Malvaceae        | -1.48                    | 0.01 | 63.6                     | 3.3  | 0.234                    | 0.047 | DO             |
| <i>Psychotria marginata</i> Sw.                                       | Rubiaceae        | -1.50                    | 0.14 | 55.3                     | 0.5  | 0.591                    | 0.018 | E              |
| <i>Quararibea asterolepis</i> Pittier                                 | Malvaceae        | -2.05                    | 0.07 | 67.4                     | 3.8  | 0.530                    | 0.049 | DB             |
| <i>Schizolobium parahyba</i> (Vell.) S.F.Blake                        | Leguminosae      | -1.74                    | 0.03 | 47.7                     | 1.3  | 0.427                    | 0.031 | E              |
| <i>Simarouba amara</i> Aubl.                                          | Simaroubaceae    | -1.78                    | 0.21 | 68.3                     | 22.0 | 0.361                    | 0.029 | E              |
| <i>Spondias radlkoferi</i> Donn.Sm.                                   | Anacardiaceae    | -1.65                    | 0.04 | 45.6                     | 10.6 | 0.305                    | 0.073 | DF             |
| <i>Sterculia apetala</i> (Jacq.) H.Karst.                             | Malvaceae        | -2.30                    | 0.18 | 41.9                     | 21.0 | 0.324                    | 0.044 | DF             |
| <i>Tabebuia rosea</i> (Bertol.) Bertero ex A.DC.                      | Bignoniaceae     | -1.95                    | 0.07 | 86.9                     | 6.4  | 0.531                    | 0.022 | DF             |
| <i>Tabernaemontana arborea</i> Rose ex J.D.Sm.                        | Apocynaceae      | -1.34                    | 0.05 | 98.1                     | 6.0  | 0.453                    | 0.027 | E              |
| <i>Tachigali versicolor</i> Standl. & L.O.Williams                    | Leguminosae      | -1.58                    | 0.02 | 80.3                     | 10.3 | 0.681                    | 0.014 | E              |
| <i>Terminalia amazonia</i> (J.F.Gmel.) Exell                          | Combretaceae     | -1.55                    | 0.06 | 103.7                    | 12.0 | 0.554                    | 0.065 | DB             |
| <i>Virola sebifera</i> Aubl.                                          | Myristicaceae    | -1.58                    | 0.14 | 78.6                     | 14.3 | 0.444                    | 0.064 | E              |
| <i>Virola surinamensis</i> (Rol. ex Rottb.) Warb.                     | Myristicaceae    | -1.74                    | 0.01 | 97.8                     | 17.1 | 0.378                    | 0.073 | E              |
| <i>Vochysia ferruginea</i> Mart.                                      | Vochysiaceae     | -1.65                    | 0.04 | 94.7                     | 10.7 | 0.442                    | 0.054 | E              |
| <i>Zanthoxylum setulosum</i> P.Wilson                                 | Rutaceae         | -1.65                    | 0.08 | 62.4                     | 20.6 | 0.423                    | 0.036 | DF             |

13 \*Leaf phenology: DB, brevideciduous; DO, obligately deciduous; DF, facultatively deciduous; D, deciduous  
 14 not specified; E, evergreen  
 15  
 16  
 17

18 Figure S1. Correlation plot indicating the relationships between  $\pi_{tlp}$ , LMA and WD. Note: Pearson correlation  
19 coefficient is given.  
20

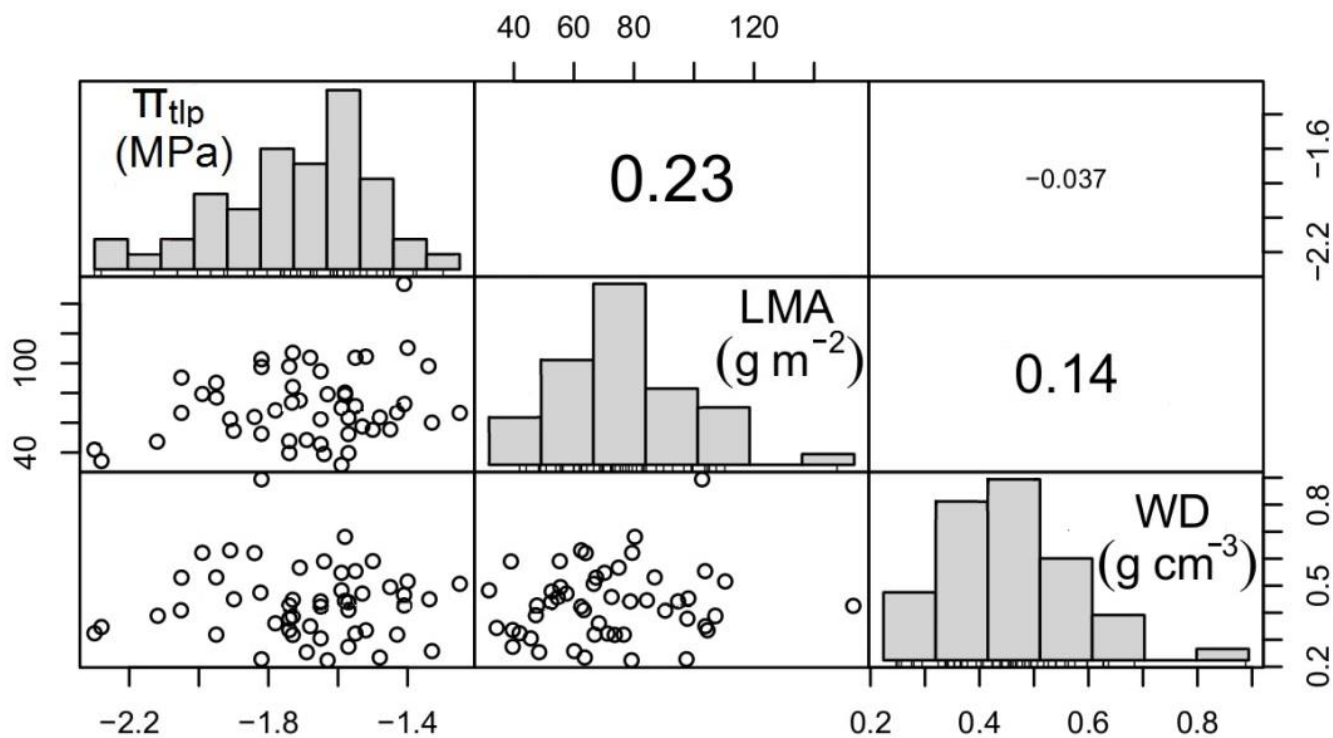

21  
22  
23  
24

25 Figure S2. Habitat associations of (a) evergreen and (b) deciduous tree species by  $\pi_{\text{tip}}$  within the Barro  
 26 Colorado Island 50-ha ForestGEO plot. Shown are habitat associations by two  $\pi_{\text{tip}}$  classes (median) for  
 27 evergreen and deciduous species. Blue bars indicate significant positive associations and red bars indicate  
 28 significant negative associations.  
 29

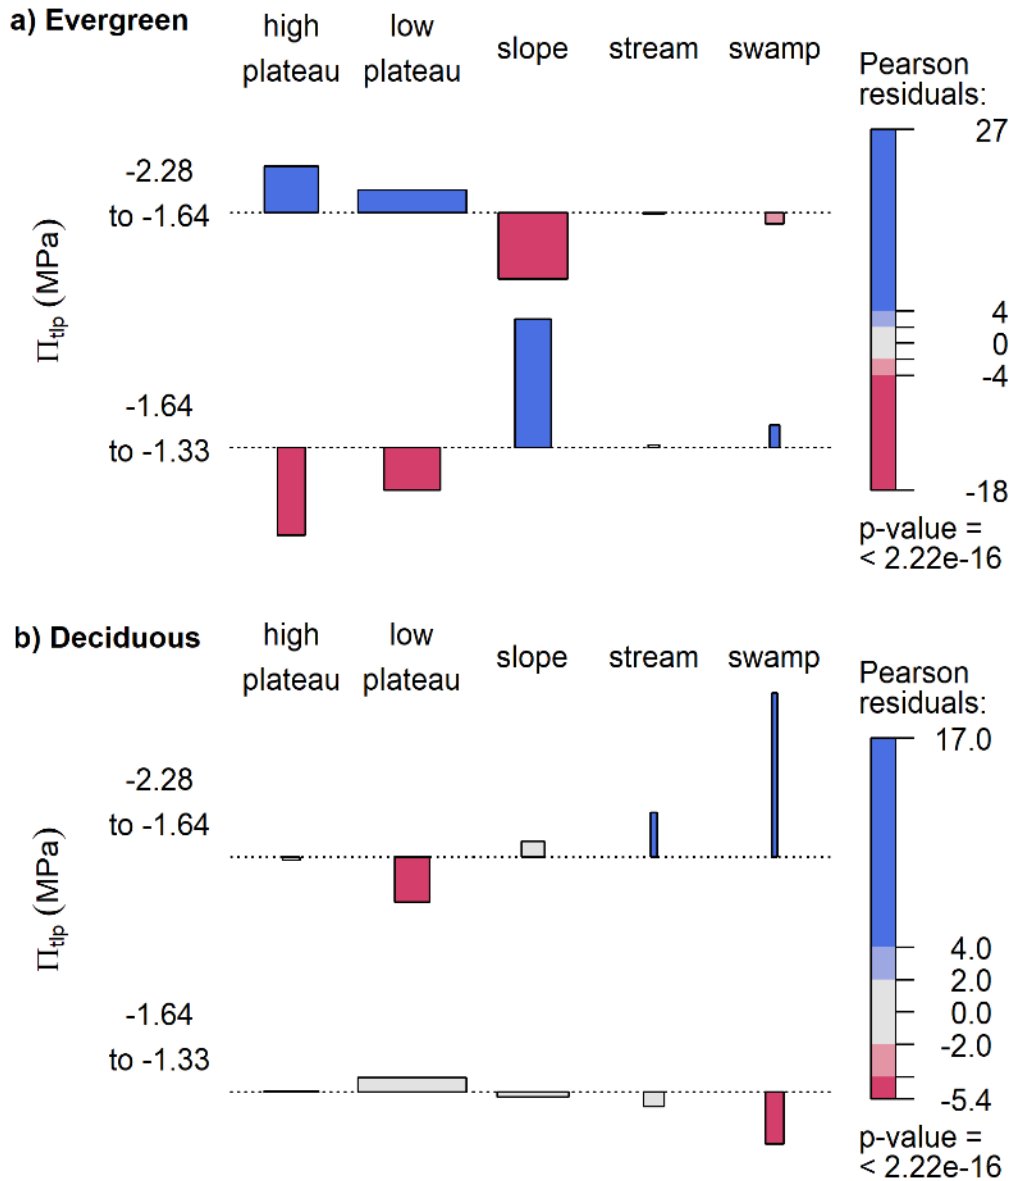

30  
 31  
 32  
 33

34 Figure S3. Linear relationship between the proportion of trees of each species growing in high plateau and  $\pi_{\text{tip}}$ ,  
35 highlighting significant Torus associations (Harms KE, Condit R, Hubbell SP, Foster RB. 2001. Habitat  
36 associations of trees and shrubs in a 50-ha neotropical forest plot. Journal of Ecology 89: 947-959.). The linear  
37 regression line is shown when the relationship is significant ( $p < 0.05$ ).  
38

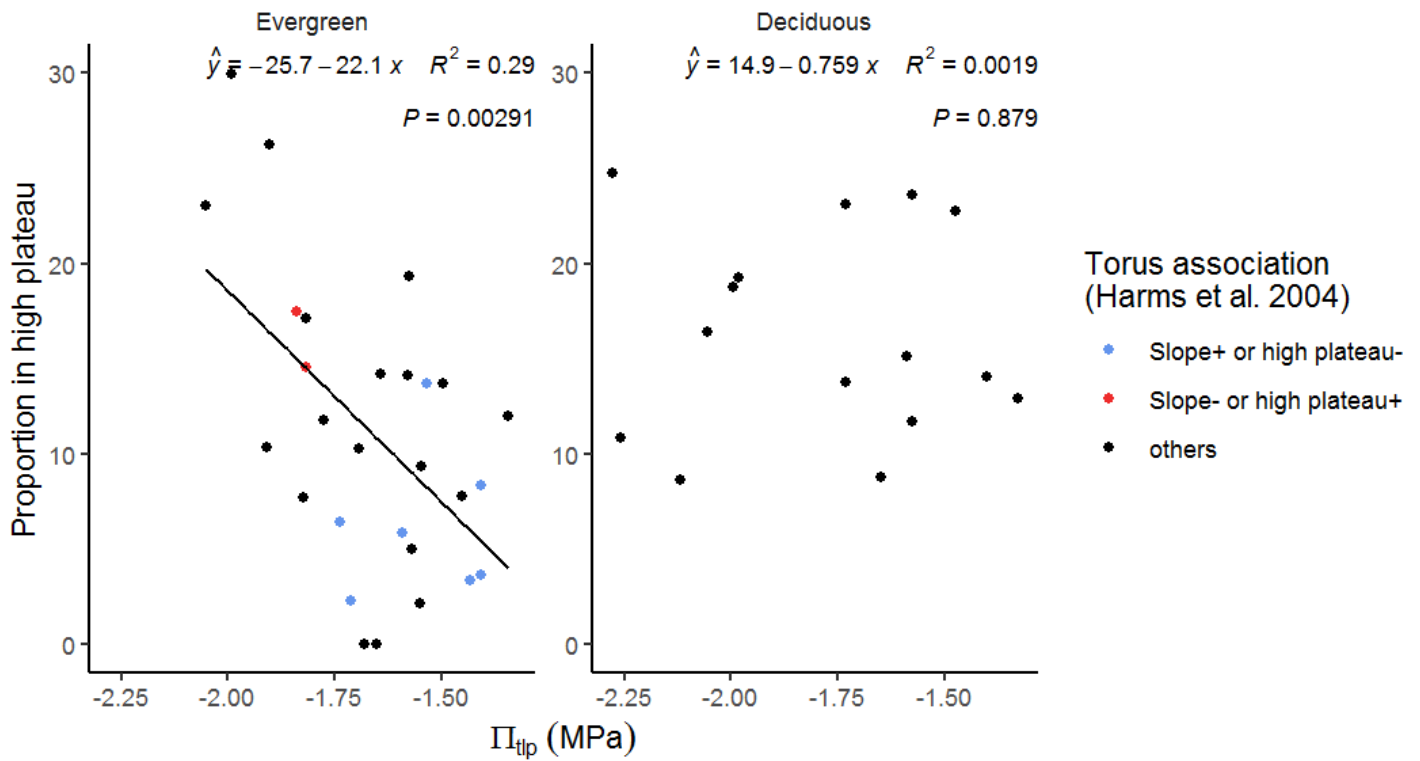

39  
40



41 Figure S4. Map of the 50-ha ForestGEO plot on Barro Colorado Island showing the distribution of (a) WD  
42 within the evergreen trees, and (b) WD within the deciduous trees.

**a) Evergreen**

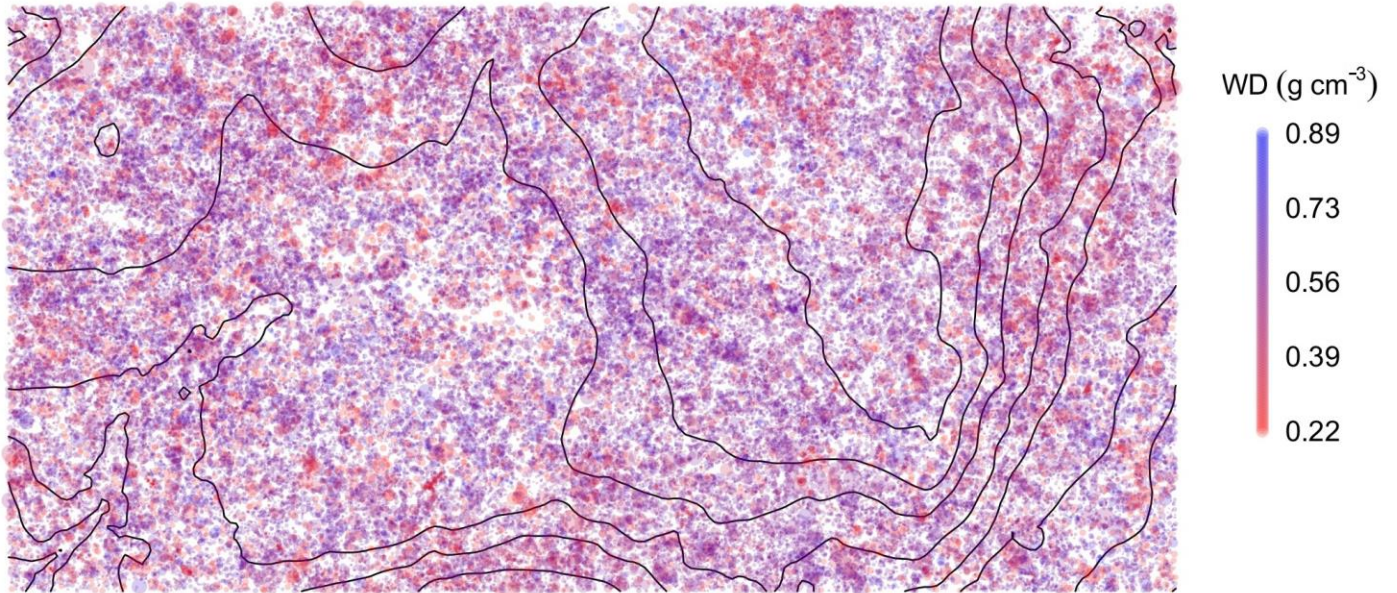

**b) Deciduous**

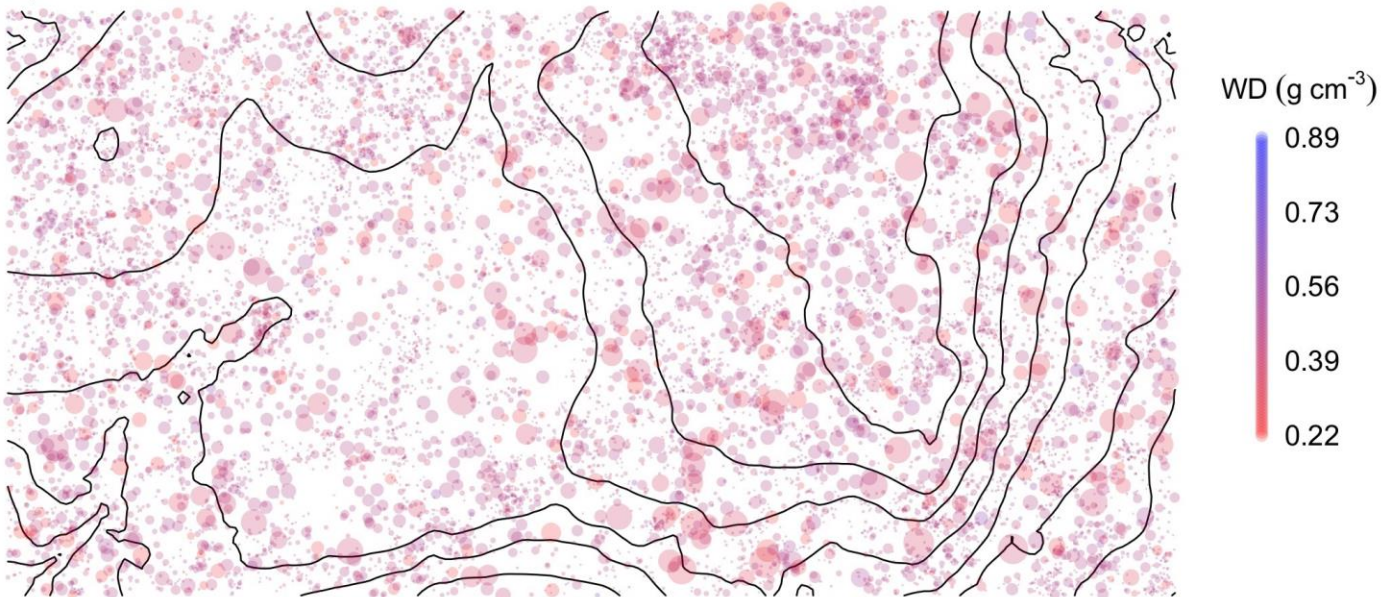

43  
44  
45  
46  
47  
48  
49

50 Figure S5. Habitat associations of evergreen and deciduous tree species by WD within the Barro Colorado  
 51 Island 50-ha ForestGEO plot. Shown are habitat associations by WD class for evergreen and deciduous species.  
 52 Blue bars indicate significant positive associations and red bars indicate significant negative associations.  
 53

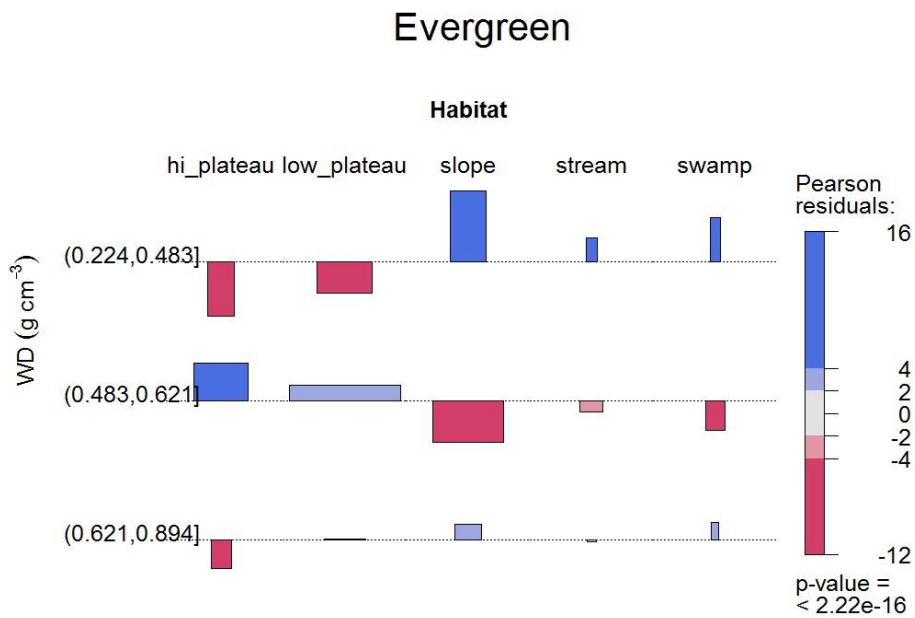

54  
55  
56

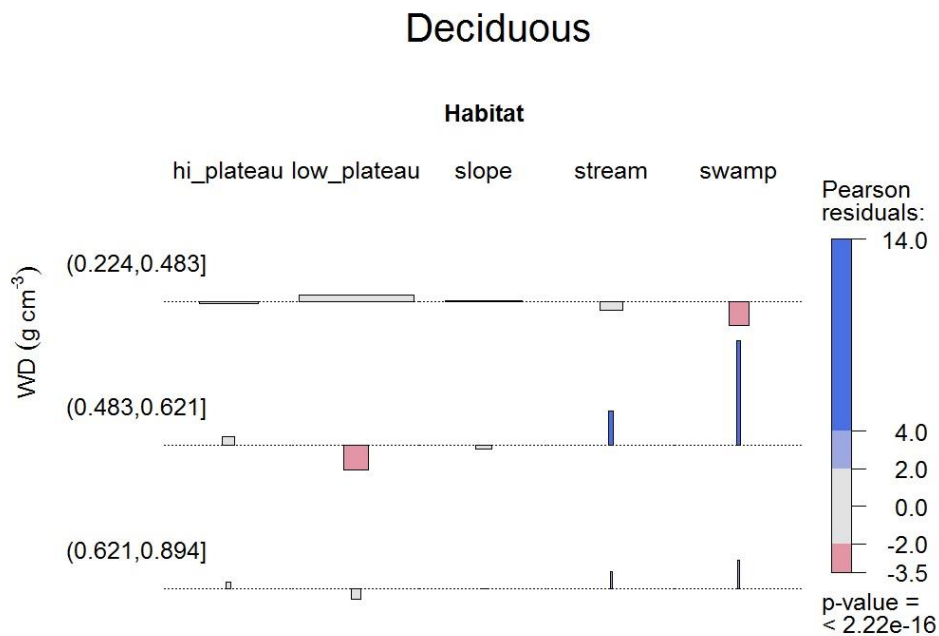

57

58 Figure S6. Linear relationship between the proportion of trees growing in high plateau and WD, highlighting  
59 significant Torus associations (Harms KE, Condit R, Hubbell SP, Foster RB. 2001. Habitat associations of trees  
60 and shrubs in a 50-ha neotropical forest plot. Journal of Ecology 89: 947-959.). The linear regression line is  
61 shown when the relationship is significant ( $p < 0.05$ ).  
62  
63  
64

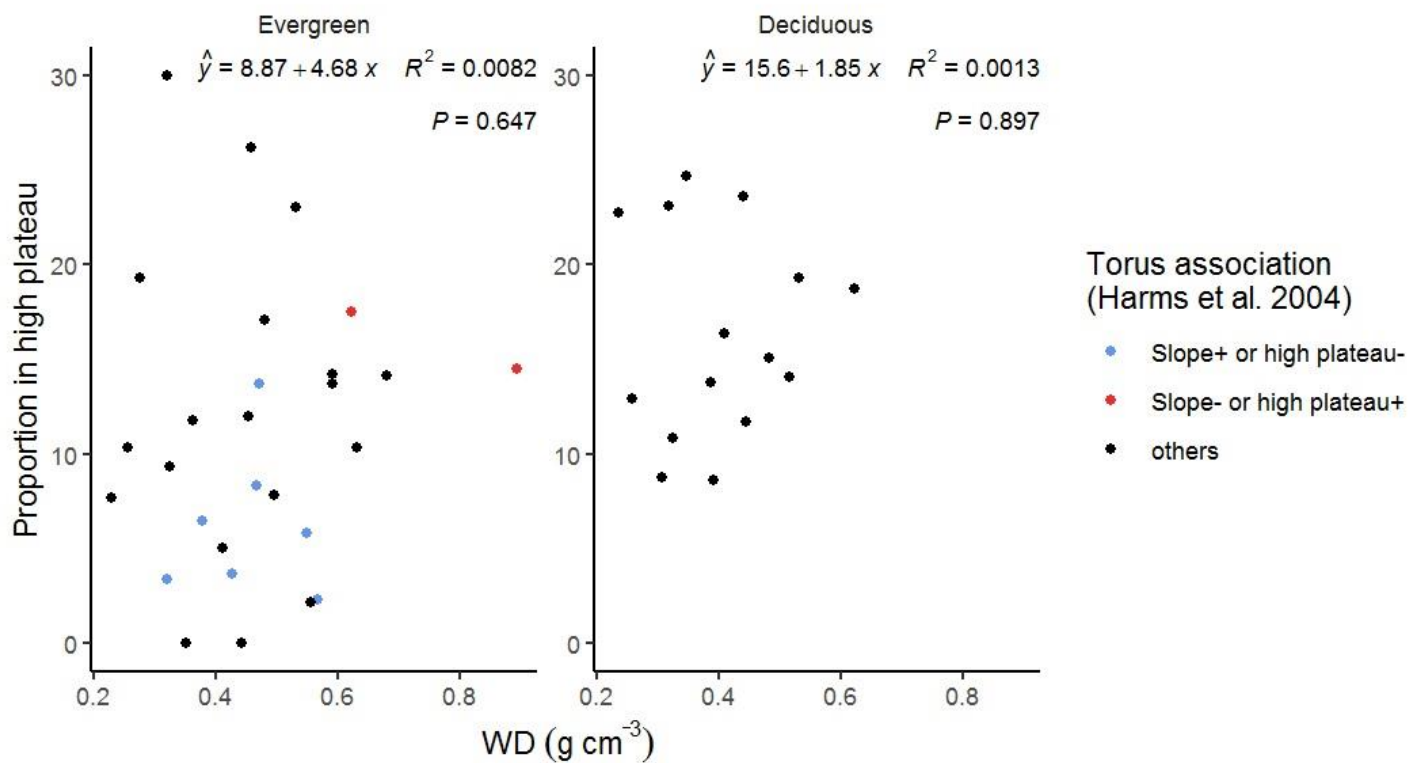

65  
66  
67  
68  
69  
70  
71  
72



73 Figure S7. Map of the 50-ha ForestGEO plot on Barro Colorado Island showing the distribution of LMA (b)  
74 within the evergreen trees, and (c) within the deciduous trees.  
75

**a) Evergreen**

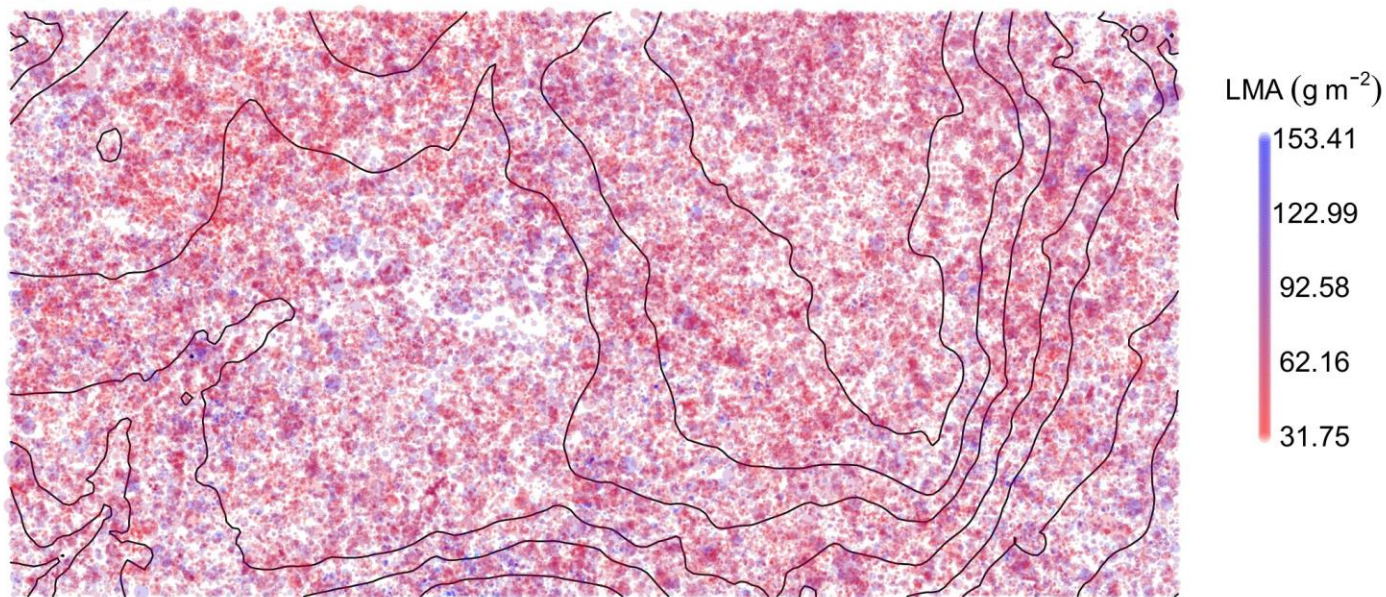

**b) Deciduous**

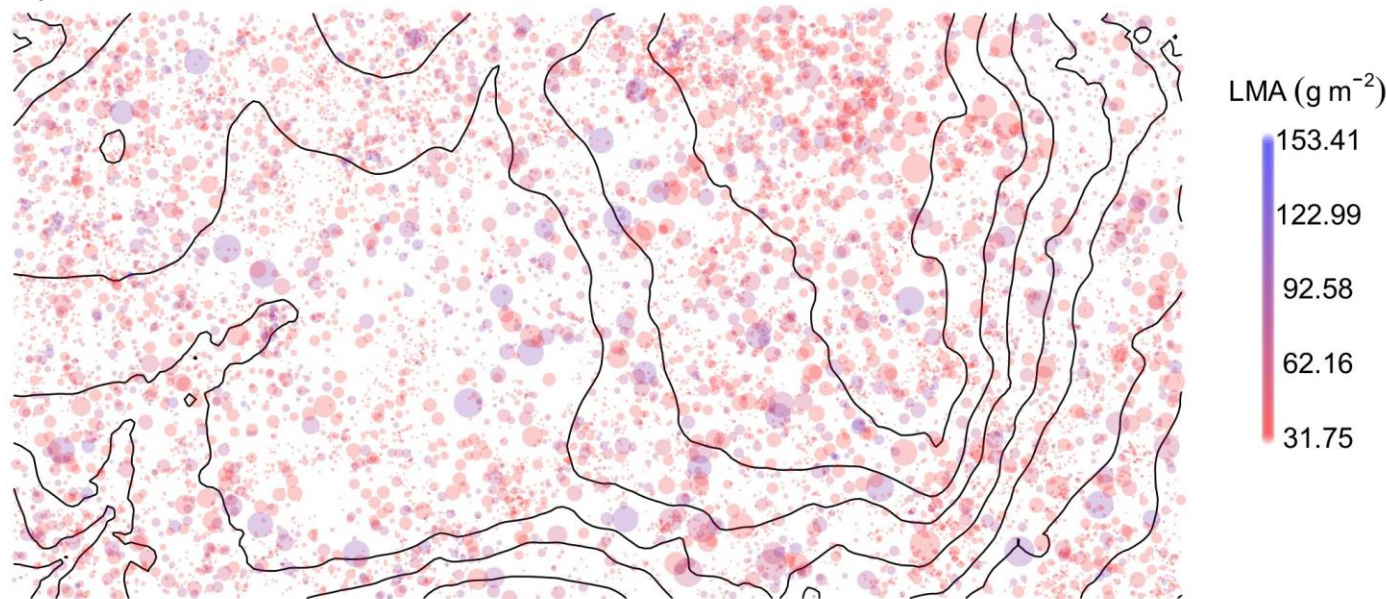

76  
77  
78  
79  
80  
81

82 Figure S8. Habitat associations of evergreen and deciduous tree species by LMA within the Barro Colorado  
 83 Island 50-ha ForestGEO plot. Shown are habitat associations by LMA class for evergreen and deciduous  
 84 species. Blue bars indicate significant positive associations and red bars indicate significant negative  
 85 associations.  
 86

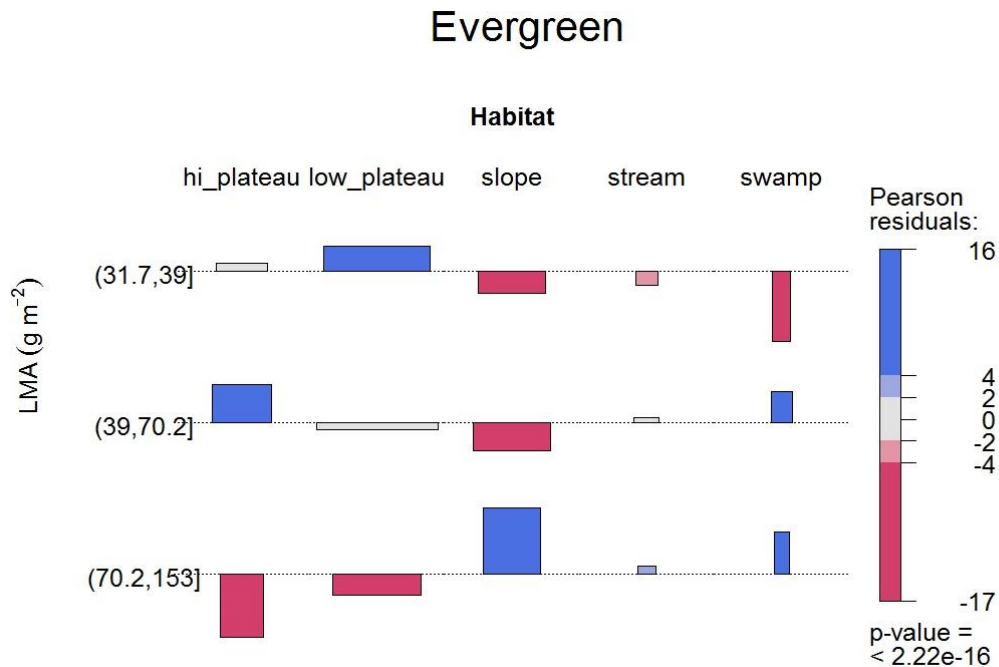

87

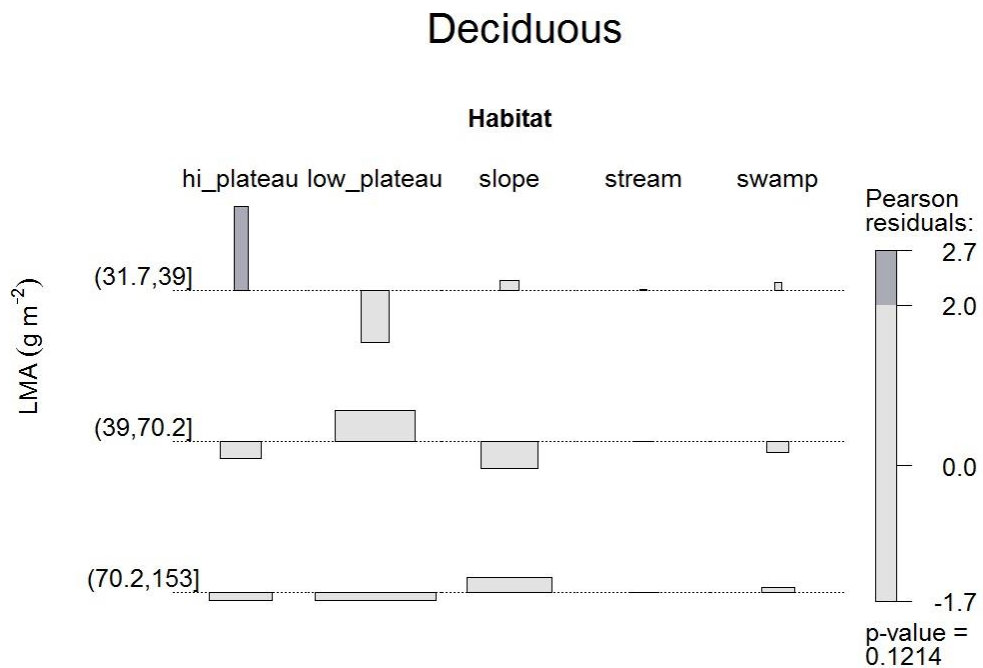

88  
 89

90 Figure S9. Linear relationship between the proportion of trees growing in high plateau and LMA, highlighting  
91 significant Torus associations (Harms KE, Condit R, Hubbell SP, Foster RB. 2001. Habitat associations of trees  
92 and shrubs in a 50-ha neotropical forest plot. Journal of Ecology 89: 947-959.). The linear regression line is  
93 shown when the relationship is significant ( $p < 0.05$ ).  
94  
95  
96

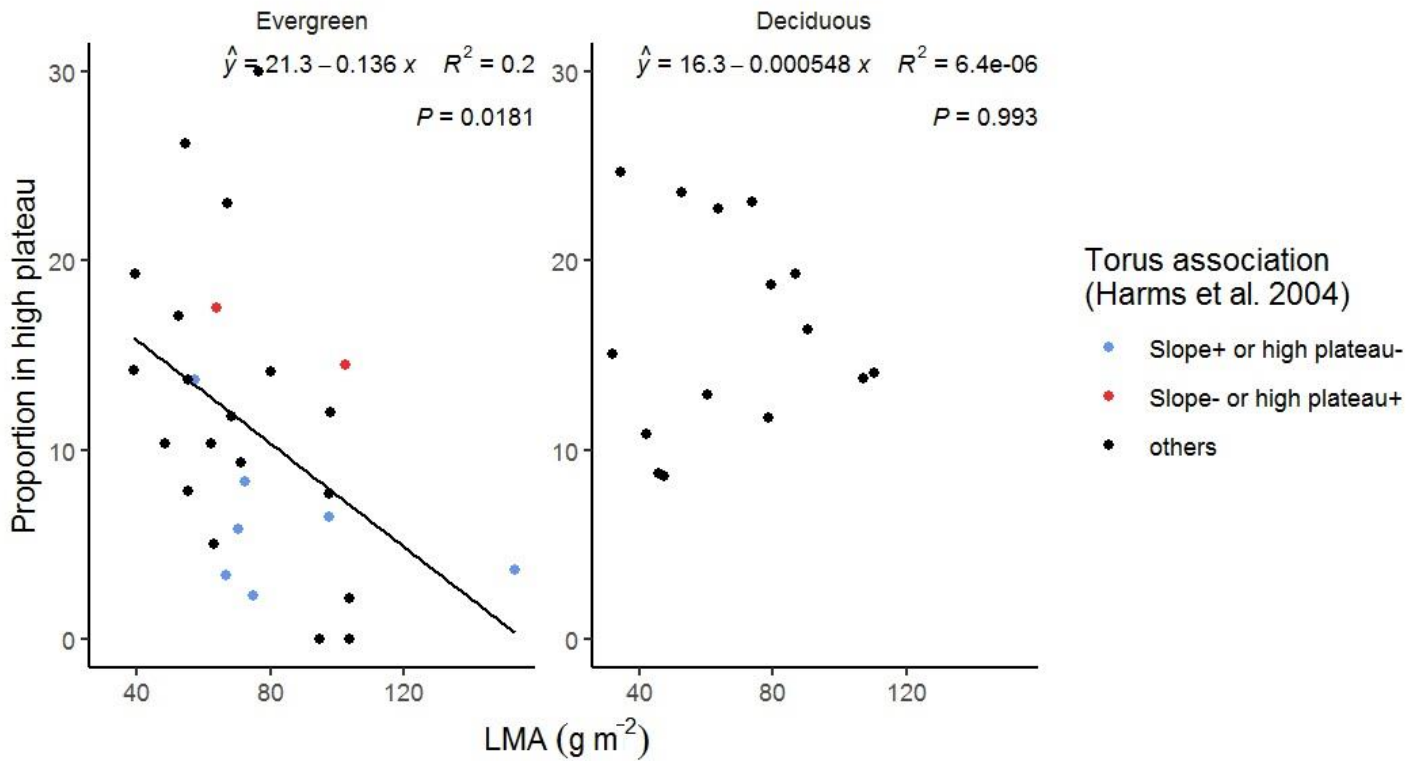

97  
98

99 Figure S10. Moisture association index (MAI; Condit R, Engelbrecht BMJ, Pino D, Pérez R, Turner BL. 2013.  
100 Species distributions in response to individual soil nutrients and seasonal drought across a community of  
101 tropical trees. Proceedings of the National Academy of Sciences 110: 5064-5068.) as a function of wood density  
102 (WD). The linear regression line is shown when the relationship is significant ( $p < 0.05$ ).  
103  
104

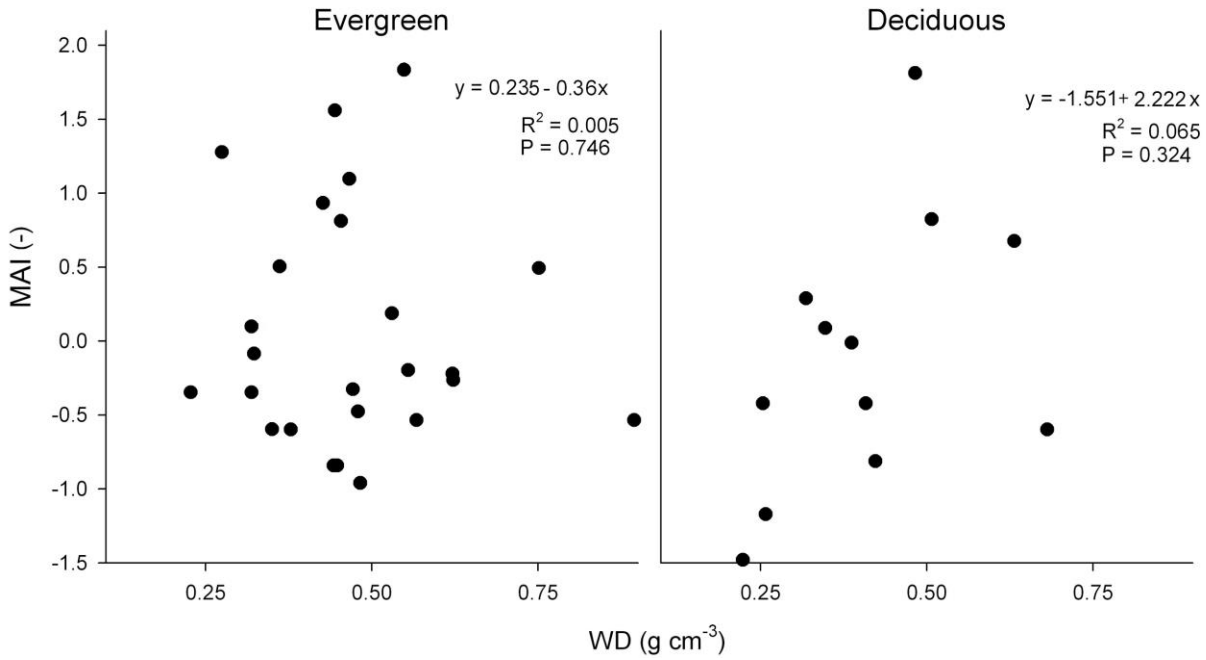

105  
106  
107  
108  
109

110 Figure S11. Moisture association index (MAI; Condit R, Engelbrecht BMJ, Pino D, Pérez R, Turner BL. 2013.  
111 Species distributions in response to individual soil nutrients and seasonal drought across a community of  
112 tropical trees. Proceedings of the National Academy of Sciences 110: 5064-5068.) as a function of leaf mass per  
113 area (LMA). The linear regression line is shown when the relationship is significant ( $p < 0.05$ ).  
114  
115

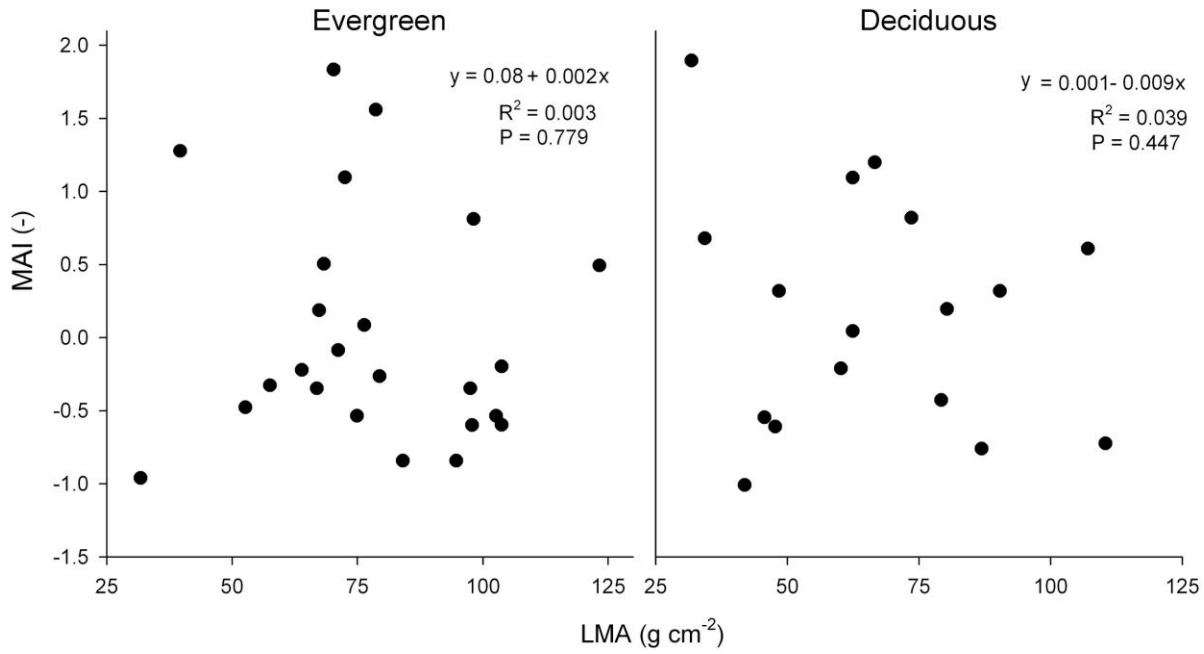

116  
117
